# Supplementary material for: Chemical Constituents of the Leaves of Diospyros kaki (Persimmon)
Source: MDPI journal article supplement (doi:10.3390/plants10102032), 2021-09-28
Supplement: s1 [file s1]

## Article

# Chemical constituents of the leaves of *Diospyros kaki* (Persimmon)

Jaeyoung Kwon <sup>1,†</sup>, Jeong Eun Park <sup>2,†</sup>, Jin Su Lee <sup>2</sup>, Jung Hwan Lee <sup>1</sup>, Hoseong Hwang <sup>1</sup>, Sang Hoon Jung <sup>1</sup>, Hak Cheol Kwon <sup>1,\*</sup>, Dae Sik Jang <sup>2,\*</sup>

<sup>1</sup> KIST Gangneung Institute of Natural Products, Korea Institute of Science and Technology (KIST), Gangneung 25451, Republic of Korea; kjy1207@kist.re.kr (J.K.); 217513@kist.re.kr (J.H.L.); hoseong91@kist.re.kr (H.H.); hkwon@kist.re.kr (H.C.K.)

<sup>2</sup> Department of Life and Nanopharmaceutical Sciences, Graduate School, Kyung Hee University, Seoul 02447, Republic of Korea; 530pje@naver.com (J.E.P.); lee2649318@naver.com (J.S.L.); dsjang@khu.ac.kr (D.S.J.)

\* Correspondence: hkwon@kist.re.kr (H.C.K.); dsjang@khu.ac.kr (D.S.J.); Tel.: +82-33-650-3504; +82-2-961-0719

† These authors contributed equally to this work and joint first authors

## List of Supporting Information

- Figure S1.** The  $^1\text{H}$  NMR spectrum of compound **1** (500 MHz, methanol- $d_4$ ).  
**Figure S2.** The  $^{13}\text{C}$  NMR spectrum of compound **1** (125 MHz, methanol- $d_4$ ).  
**Figure S3.** The COSY NMR spectrum of compound **1** (methanol- $d_4$ ).  
**Figure S4.** The HSQC NMR spectrum of compound **1** (methanol- $d_4$ ).  
**Figure S5.** The HMBC NMR spectrum of compound **1** (methanol- $d_4$ ).  
**Figure S6.** The ROESY NMR spectrum of compound **1** (methanol- $d_4$ ).  
**Figure S7.** The UV spectrum of compound **1** (MeOH).  
**Figure S8.** The IR spectrum of compound **1**.  
**Figure S9.** The HRMS spectrum of compound **1**.  
**Figure S10.** The  $^1\text{H}$  NMR spectrum of compound **3** (500 MHz, methanol- $d_4$ ).  
**Figure S11.** The  $^{13}\text{C}$  NMR spectrum of compound **3** (125 MHz, methanol- $d_4$ ).  
**Figure S12.** The COSY NMR spectrum of compound **3** (methanol- $d_4$ ).  
**Figure S13.** The HSQC NMR spectrum of compound **3** (methanol- $d_4$ ).  
**Figure S14.** The HMBC NMR spectrum of compound **3** (methanol- $d_4$ ).  
**Figure S15.** The ROESY NMR spectrum of compound **3** (methanol- $d_4$ ).  
**Figure S16.** The UV spectrum of compound **3** (MeOH).  
**Figure S17.** The IR spectrum of compound **3**.  
**Figure S18.** The HRMS spectrum of compound **3**.  
**Figure S19.** The  $^1\text{H}$  NMR spectrum of compound **11** (500 MHz, dimethyl sulfoxide- $d_6$ ).  
**Figure S20.** The  $^{13}\text{C}$  NMR spectrum of compound **11** (125 MHz, dimethyl sulfoxide- $d_6$ ).  
**Table S1.** The quantitative analysis of other 18 compounds.

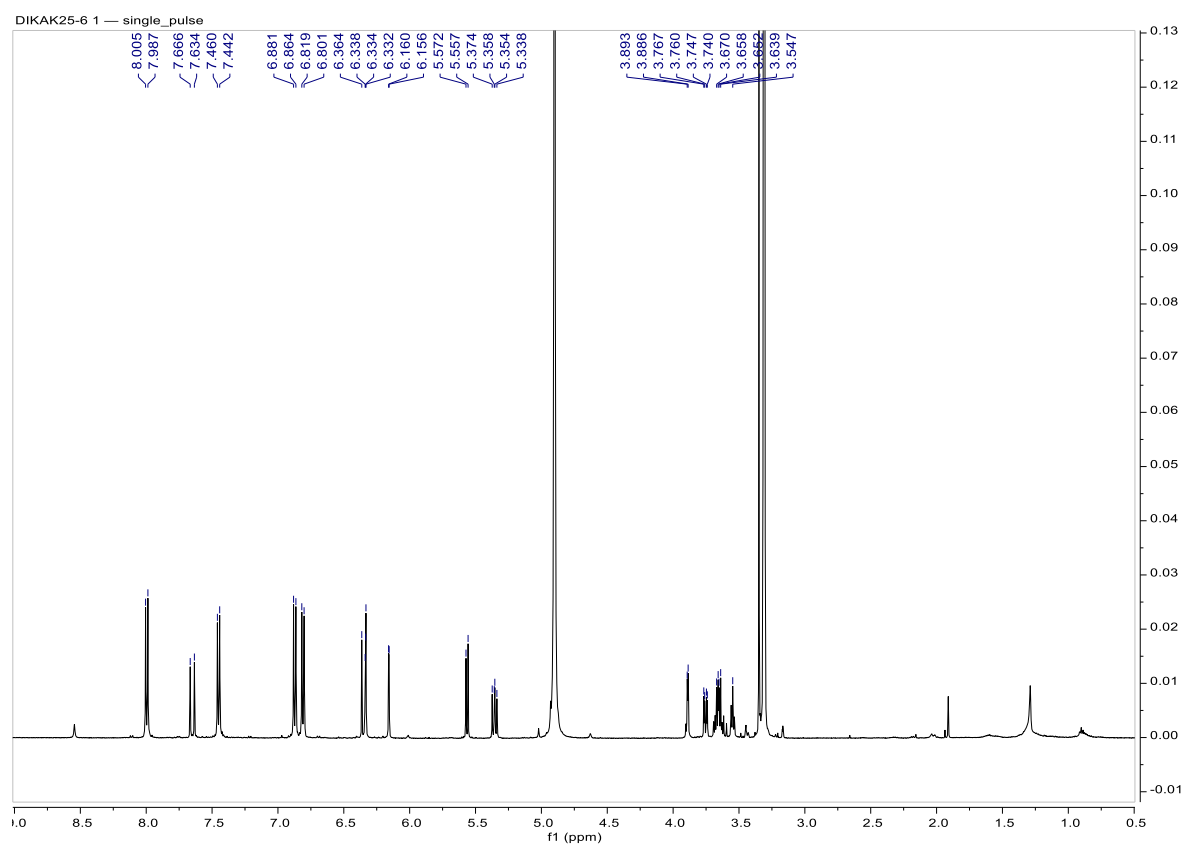

**Figure S1.** The  $^1\text{H}$  NMR spectrum of compound **1** (500 MHz, methanol- $d_4$ ).

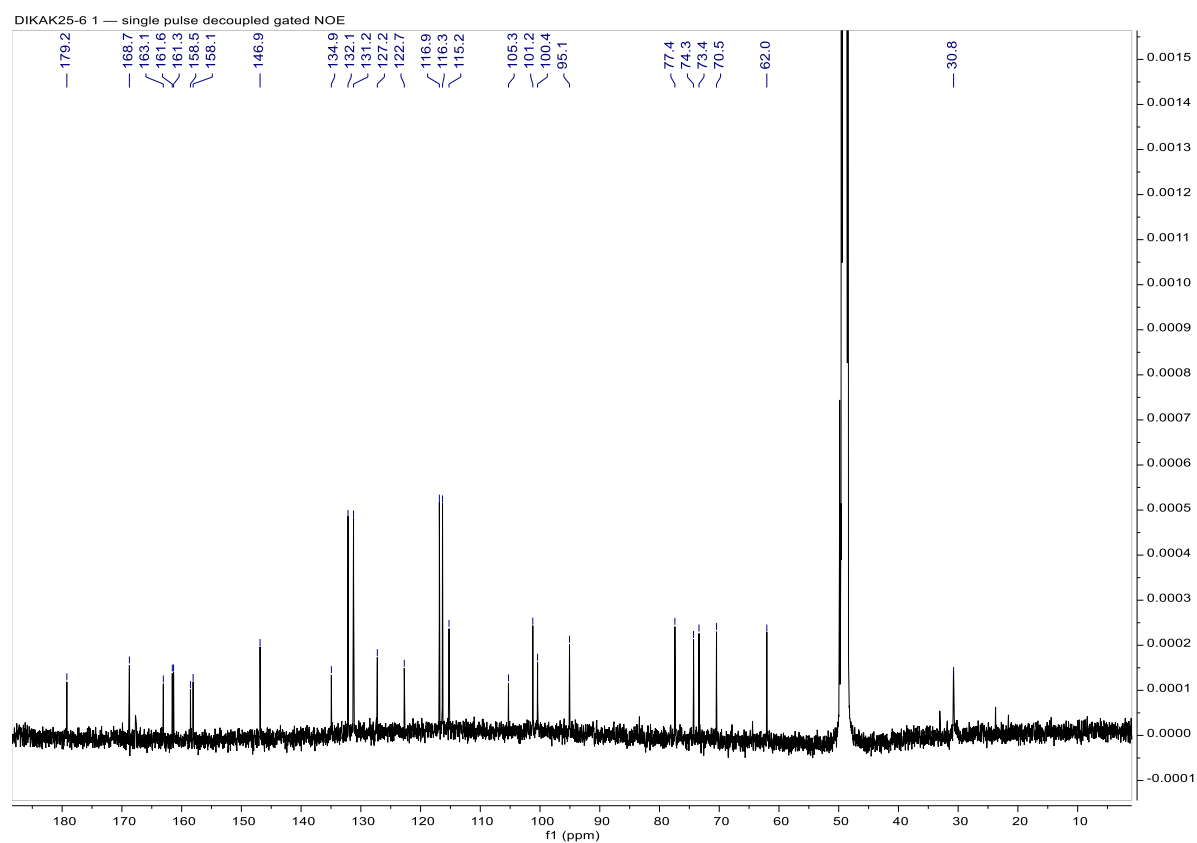

**Figure S2.** The  $^{13}\text{C}$  NMR spectrum of compound **1** (125 MHz, methanol- $d_4$ ).

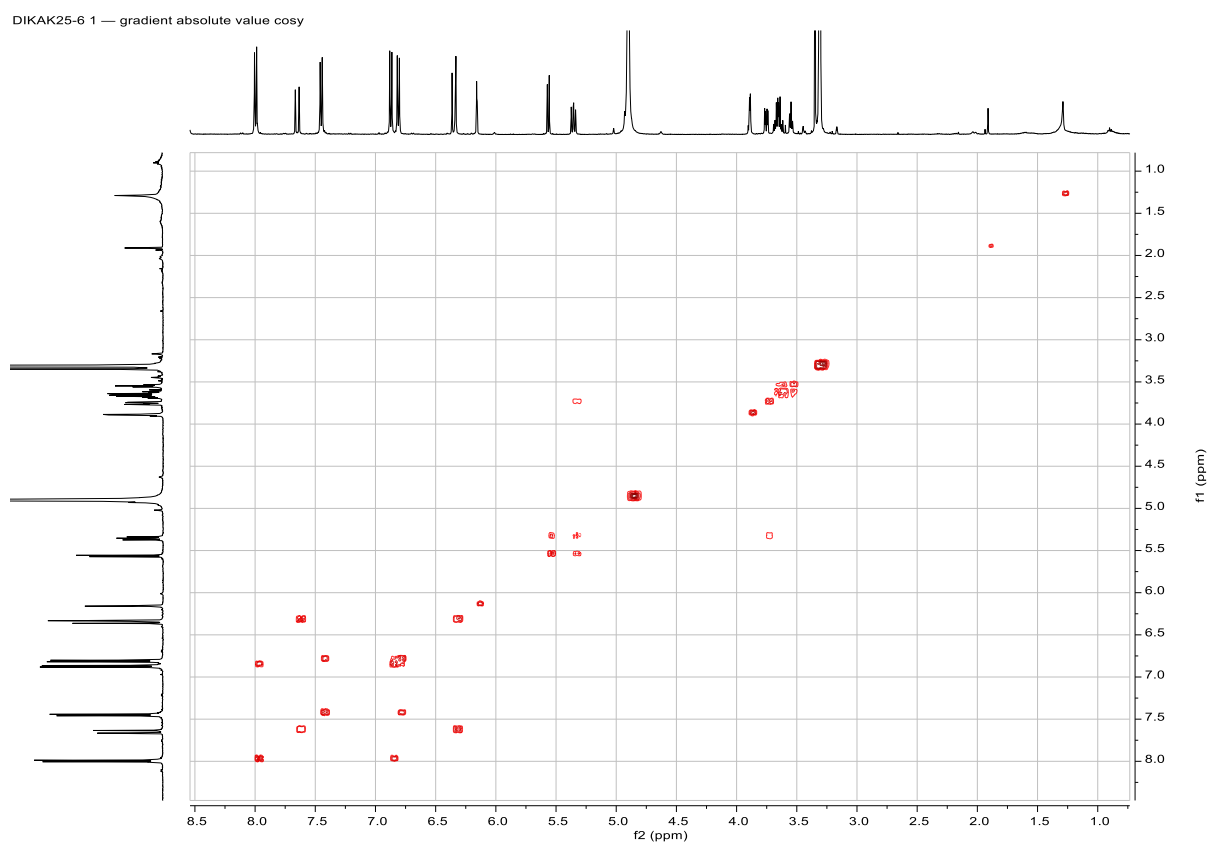

**Figure S3.** The COSY NMR spectrum of compound **1** (methanol-*d*<sub>4</sub>).

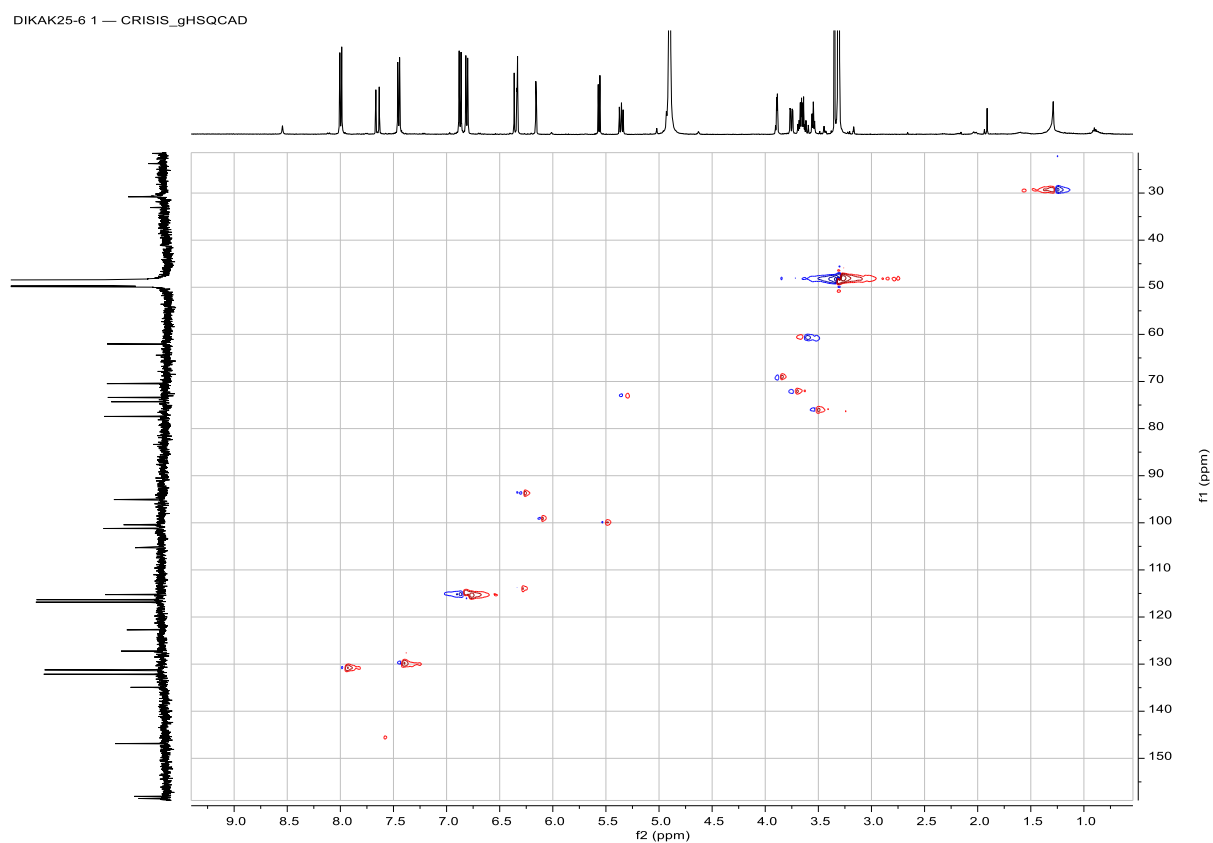

Figure S4. The HSQC NMR spectrum of compound 1 (methanol- $d_4$ ).

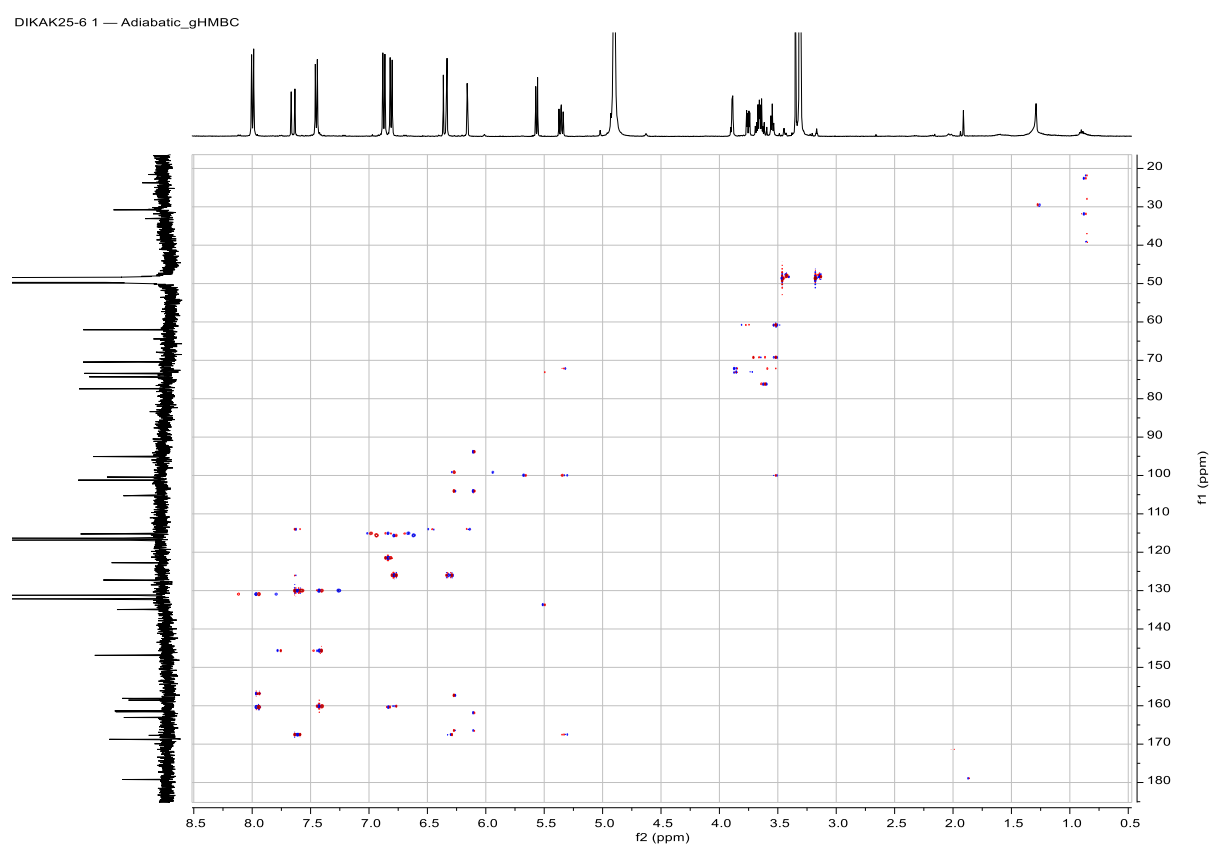

Figure S5. The HMBC NMR spectrum of compound 1 (methanol- $d_4$ ).

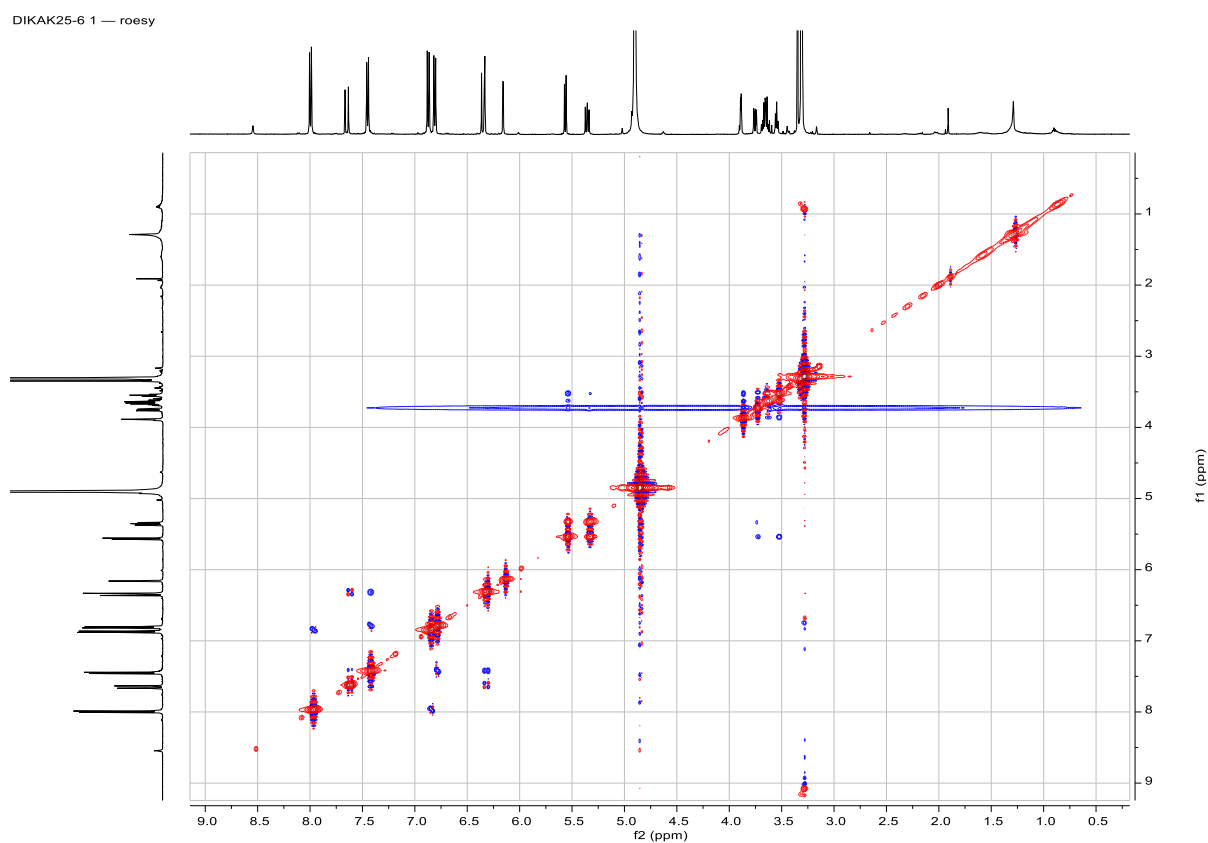

**Figure S6.** The ROESY NMR spectrum of compound **1** (methanol- $d_4$ ).



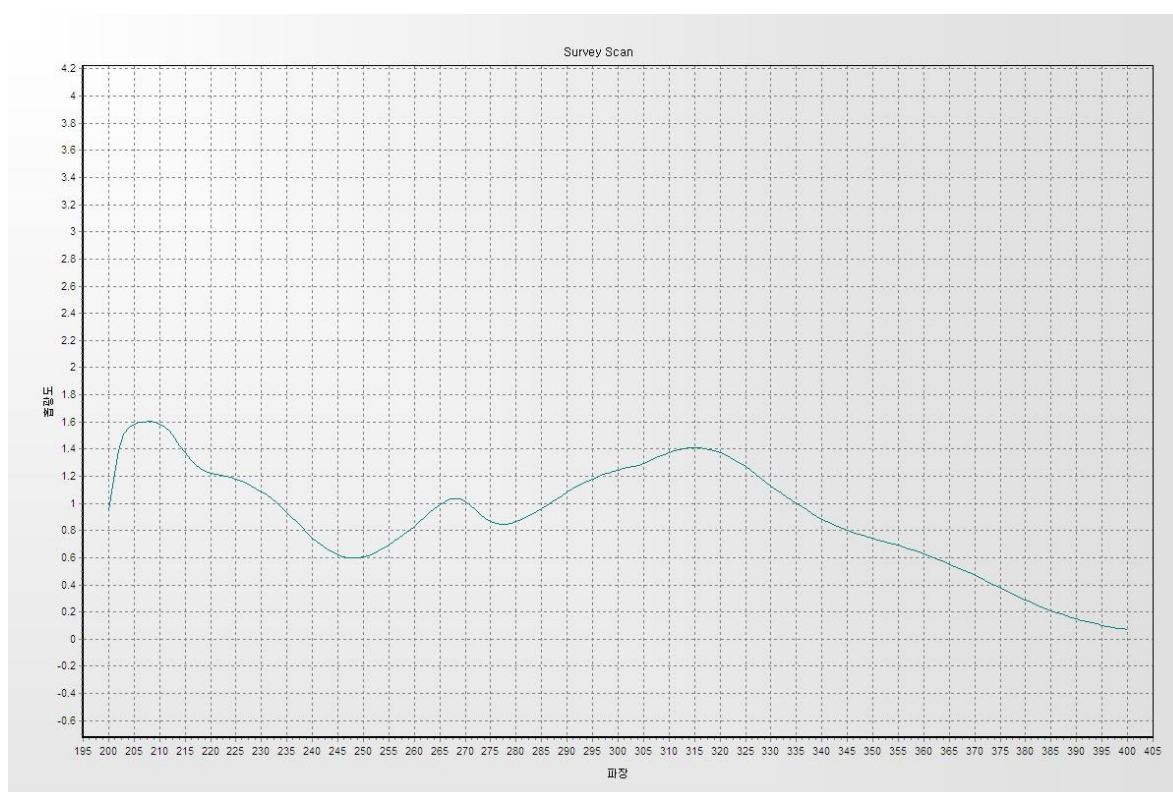

**Figure S7.** The UV spectrum of compound **1** (MeOH).

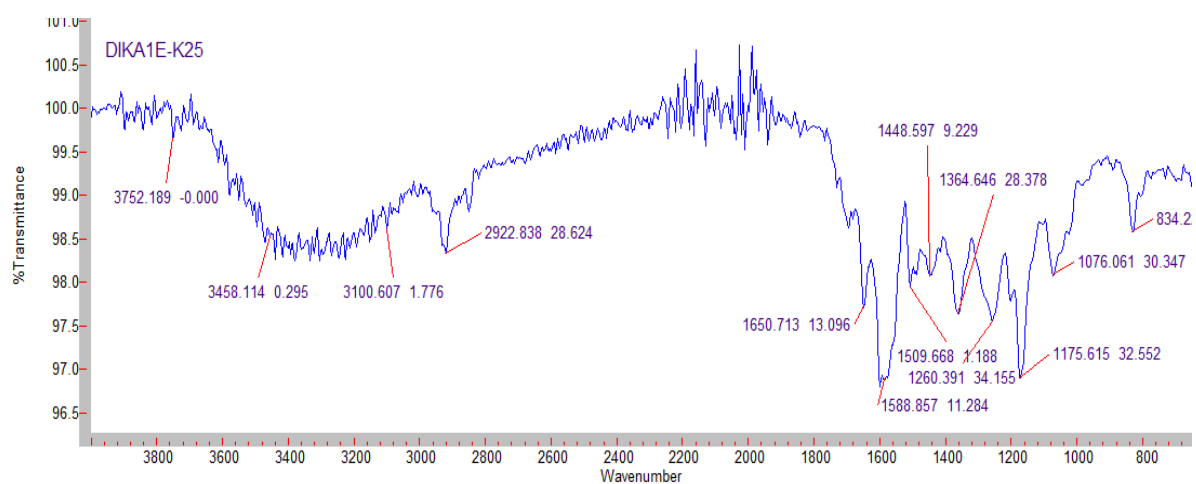

Figure S8. The IR spectrum of compound 1.

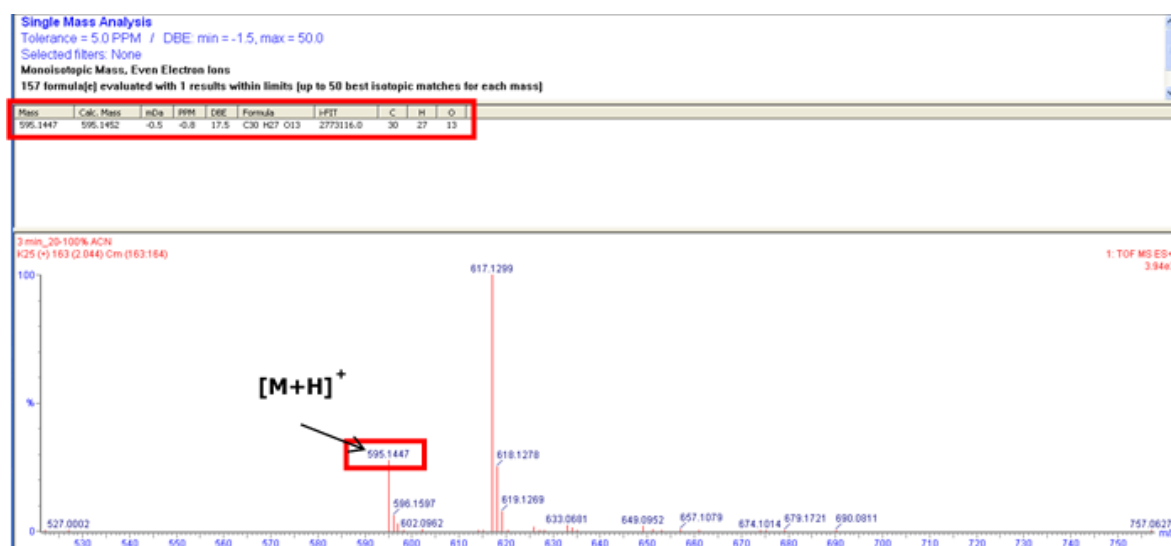

Figure S9. The HRMS spectrum of compound 1.



**Figure S10.** The  $^1\text{H}$  NMR spectrum of compound **3** (500 MHz, methanol- $d_4$ ).



**Figure S11.** The  $^{13}\text{C}$  NMR spectrum of compound **3** (125 MHz, methanol- $d_4$ ).



**Figure S12.** The COSY NMR spectrum of compound 3 (methanol- $d_4$ ).



Figure S13. The HSQC NMR spectrum of compound 3 (methanol- $d_4$ ).



Figure S14. The HMBC NMR spectrum of compound 3 (methanol- $d_4$ ).





**Figure S15.** The ROESY NMR spectrum of compound **3** (methanol- $d_4$ ).

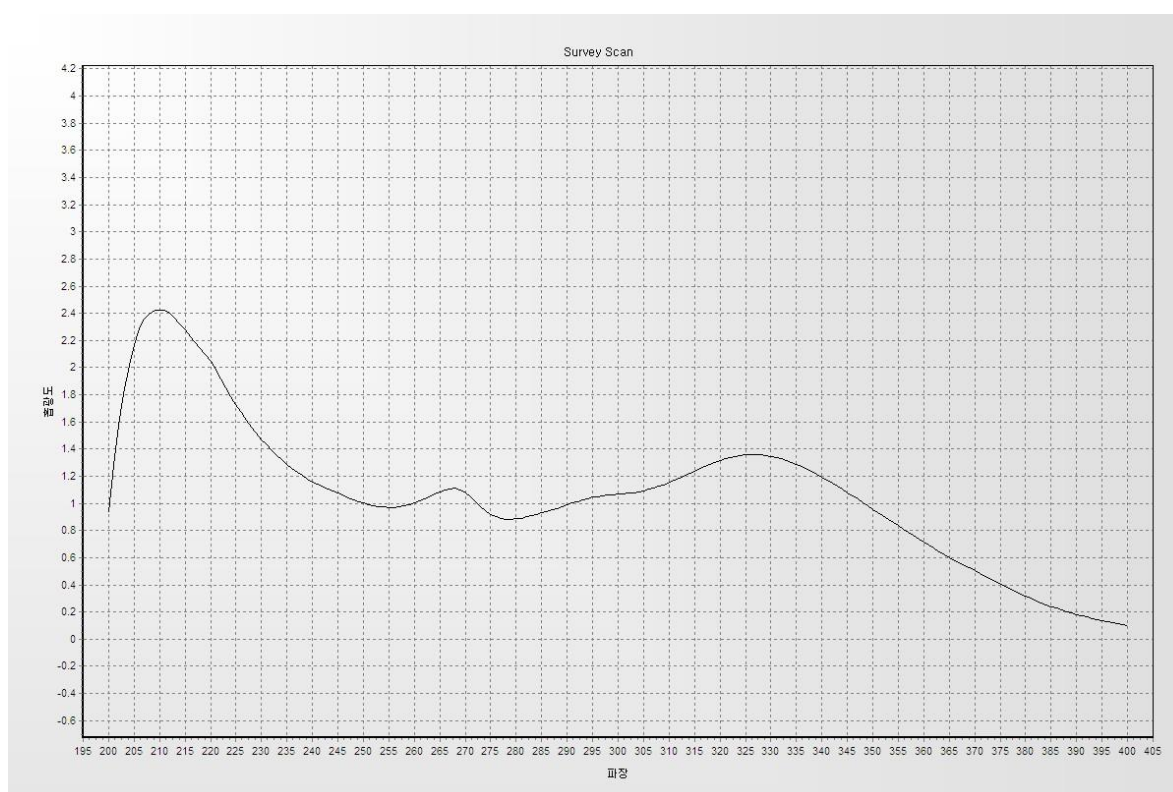

**Figure S16.** The UV spectrum of compound 3 (MeOH).

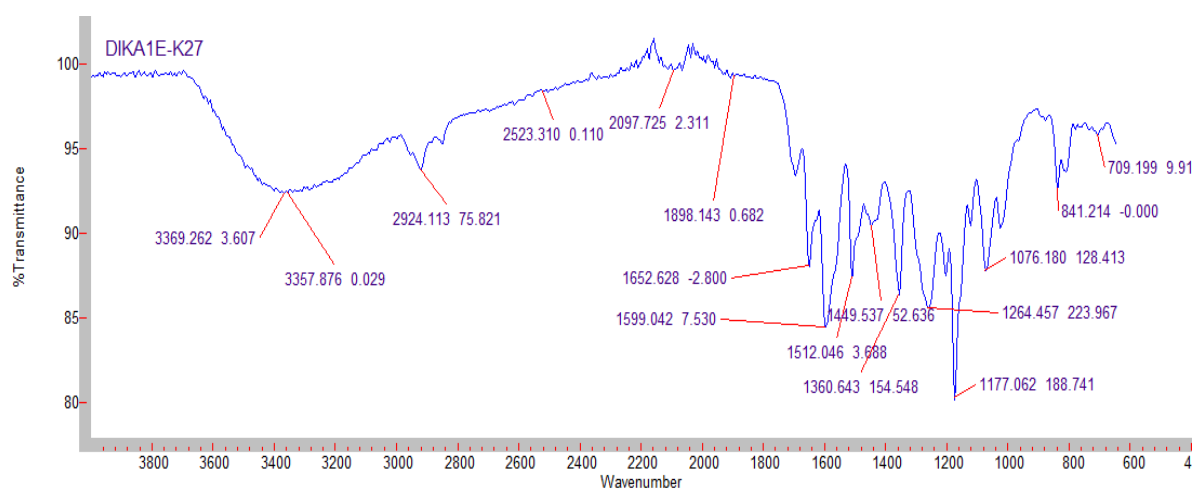

Figure S17. The IR spectrum of compound 3.

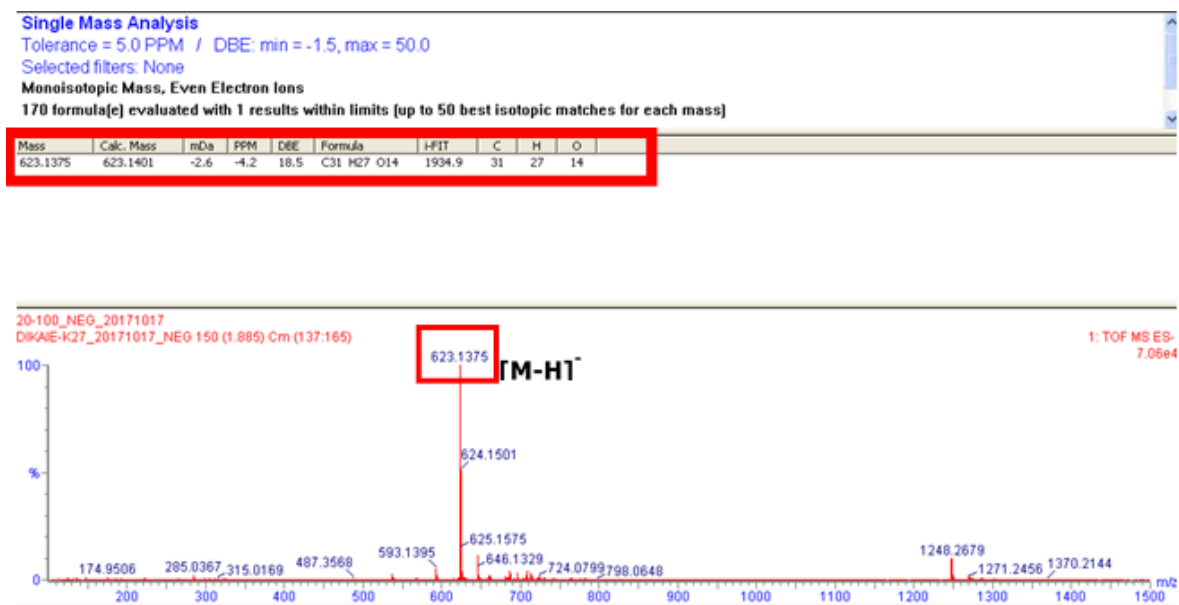

Figure S18. The HRMS spectrum of compound 3.

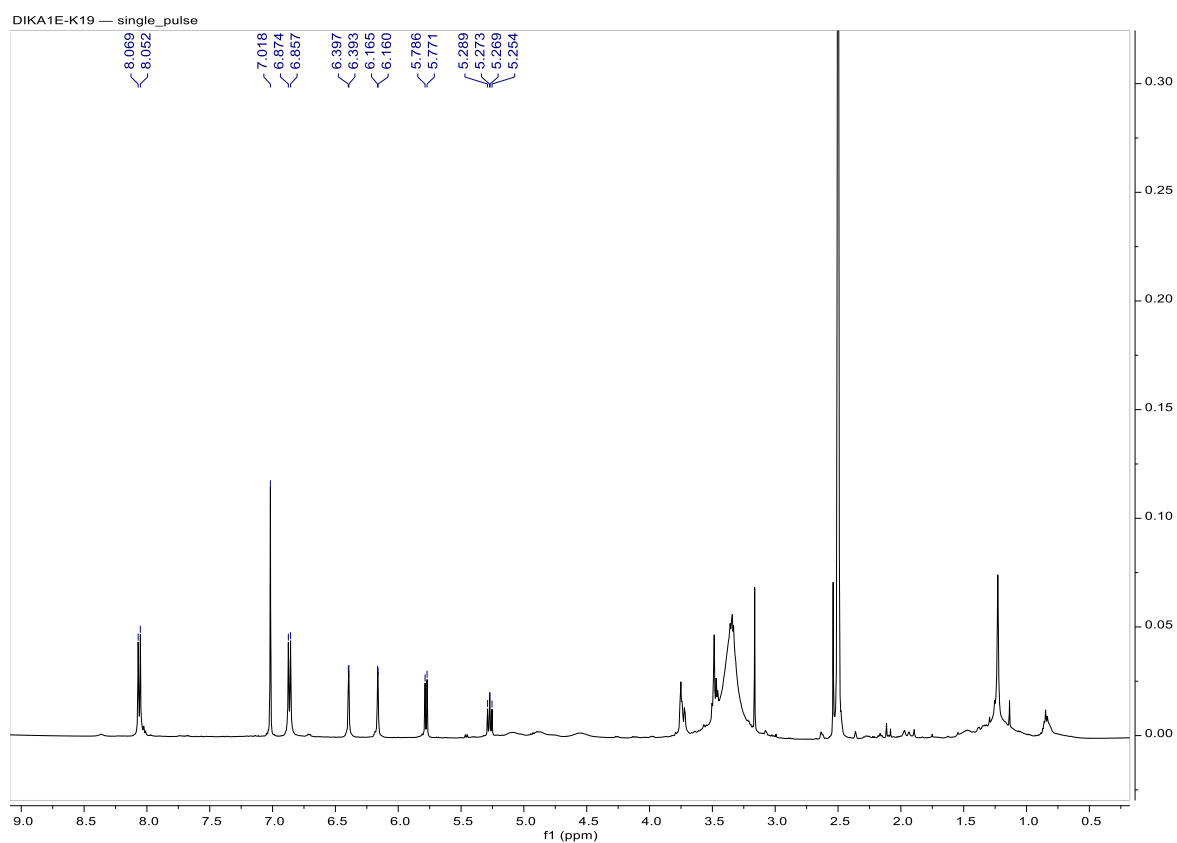

**Figure S19.** The  $^1\text{H}$  NMR spectrum of compound **11** (500 MHz, dimethyl sulfoxide- $d_6$ ).

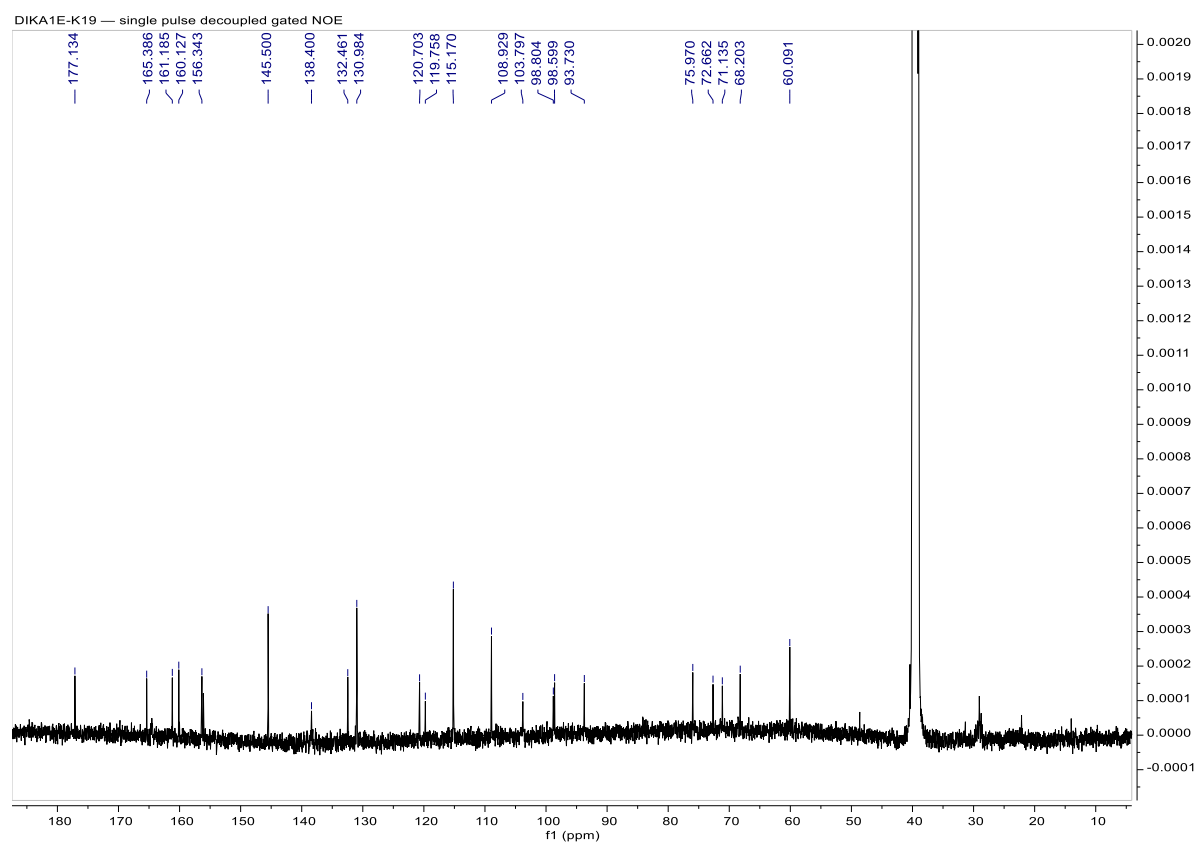

Figure S20. The  $^{13}\text{C}$  NMR spectrum of compound **11** (125 MHz, dimethyl sulfoxide- $d_6$ ).

**Table S1.** The quantitative analysis of other 18 compounds.

| No | Content (%) | No | Content (%) |
|----|-------------|----|-------------|
| 1  | 0.01        | 19 | N/D         |
| 2  | 0.01        | 20 | N/D         |
| 3  | N/D         | 21 | 0.89        |
| 9  | 0.30        | 22 | 0.38        |
| 10 | 0.72        | 23 | 0.59        |
| 12 | 0.10        | 24 | 1.25        |
| 14 | 0.01        | 25 |             |
| 17 | 0.25        | 26 |             |
| 18 | N/D         | 27 | 2.82        |
